44. Tononi G, Boly M, Massimini M, Koch C: Integrated information theory: From consciousness to its physical substrate. *Nat Rev Neurosci* 2016; 17:450–61
45. Hudetz AG, Liu X, Pillay S, Boly M, Tononi G: Propofol anesthesia reduces Lempel–Ziv complexity of spontaneous brain activity in rats. *Neurosci Lett* 2016; 628:132–5
46. Blain-Moraes S, Tarnal V, Vanini G, Bel-Behar T, Janke E, Picton P, Golmirzaie G, Palanca BJA, Avidan MS, Kelz MB, Mashour GA: Network efficiency and posterior alpha patterns are markers of recovery from general anesthesia: A high-density electroencephalography study in healthy volunteers. *Front Hum Neurosci* 2017; 11:328
47. Shortal BP, Hickman LB, Mak-McCully RA, Wang W, Brennan C, Ung H, Litt B, Tarnal V, Janke E, Picton P, Blain-Moraes S, Maybrier HR, Muench MR, Lin N, Avidan MS, Mashour GA, McKinstry-Wu AR, Kelz MB, Palanca BJ, Proekt A; ReCCognition Study Group: Duration of EEG suppression does not predict recovery time or degree of cognitive impairment after general anaesthesia in human volunteers. *Br J Anaesth* 2019; 123:206–18
48. Segalowitz SJ, Santesso DL, Jetha MK: Electrophysiological changes during adolescence: A review. *Brain Cogn* 2010; 72:86–100
49. Purdon PL, Pierce ET, Mukamel EA, Prerau MJ, Walsh JL, Wong KF, Salazar-Gomez AF, Harrell PG, Sampson AL, Cimenser A, Ching S, Kopell NJ, Tavares-Stoeckel C, Habeeb K, Merhar R, Brown EN: Electroencephalogram signatures of loss and recovery of consciousness from propofol. *Proc Natl Acad Sci USA* 2013; 110:E1142–51
50. Davidson AJ, Sale SM, Wong C, McKeever S, Sheppard S, Chan Z, Williams C: The electroencephalograph during anesthesia and emergence in infants and children. *Paediatr Anaesth* 2008; 18:60–70

## ANESTHESIOLOGY REFLECTIONS FROM THE WOOD LIBRARY-MUSEUM

# After the Ether Dome, Bulfinch Drafted His Way to the U.S. Capitol

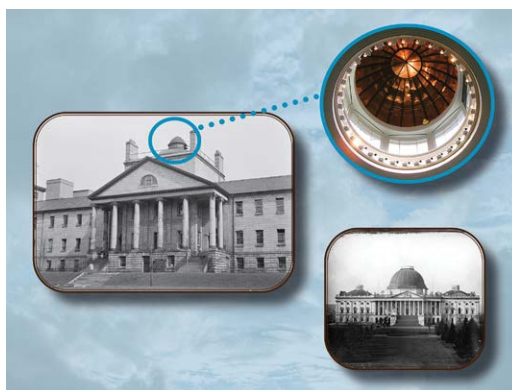

Boston's Ether Dome (*encircled, left*), the crown of Massachusetts General Hospital's Bulfinch Building (*left*), soared to fame 175 years ago after William T. G. Morton's public demonstration of ether anesthesia. Designated a National Historic Landmark in 1965, the Ether Dome is more than a captivating copper cupola. Blending essential function with elegant form, the design featured windows (*upper right*) to illuminate the surgical theater below. Its draftsman was Charles Bulfinch, a Bostonian architect renowned for his neoclassical style. A year into construction of his namesake building, Bulfinch was recruited to be the "Architect of the Capitol" in Washington, D.C. His design for the United States Capitol Dome (*lower right*), in contrast to that of the Ether Dome, relied more on form than function. Its imposing size and aesthetic symbolized the strength of the young republic, while its problematic wooden construction required frequent repairs. Although diminutive in its dimensions, the Ether Dome would prove to be Bulfinch's more enduring legacy; his original Capitol Dome was replaced with a larger cast-iron version in 1863. (Copyright © the American Society of Anesthesiologists' Wood Library-Museum of Anesthesiology.)

Melissa L. Coleman, M.D., Penn State College of Medicine, Hershey, Pennsylvania, and Jane S. Moon, M.D., University of California, Los Angeles, California.
